# Supplementary material for: Assessment of Tunisian Trichoderma Isolates on Wheat Seed Germination, Seedling Growth and Fusarium Seedling Blight Suppression
Source: MDPI journal article supplement (doi:10.3390/microorganisms11061512), 2023-06-06
Supplement: s1 [file s1]

# Figure S2

*T. afroharzianum*  
(Tahz01)

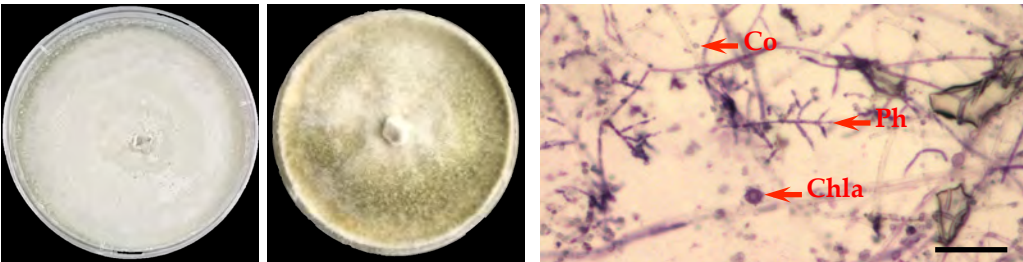

*T. afroharzianum*  
(Tahz02)

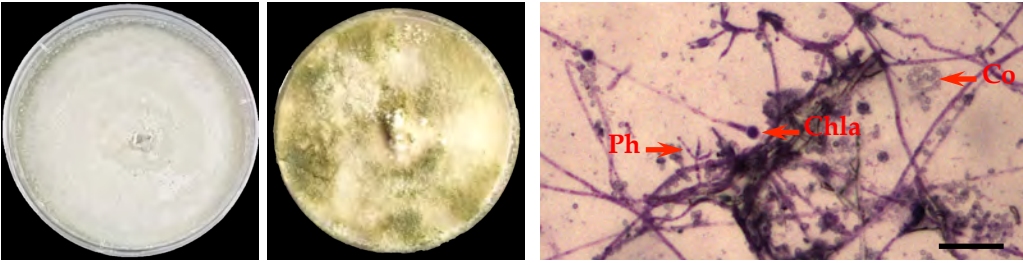

*T. afroharzianum*  
(Tahz03)

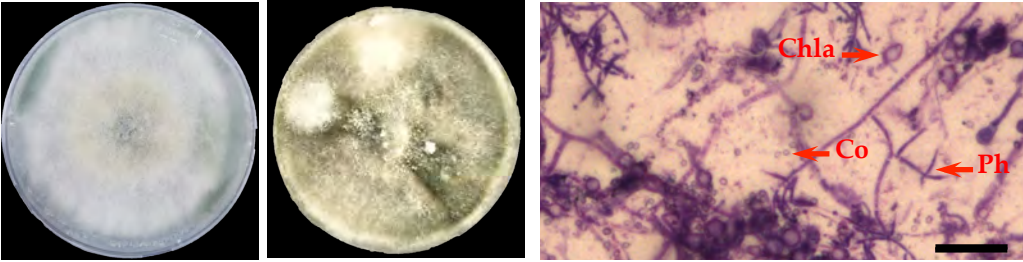

*T. atrobrunneum*  
(Tatr01)

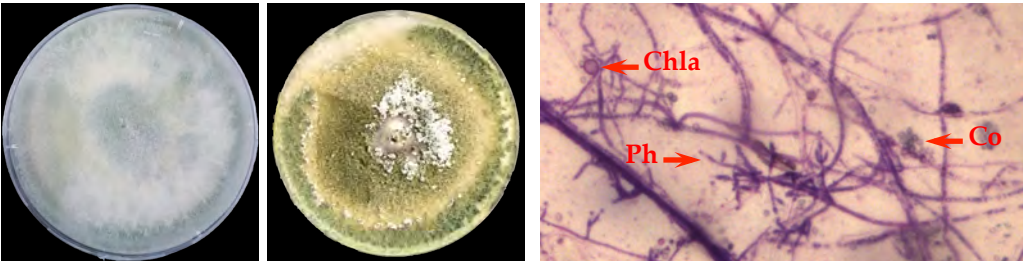

*T. lentinulae*  
(Tlen01)

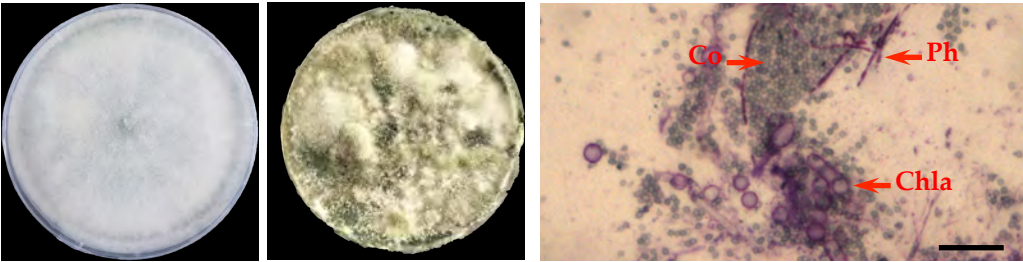

*T. Lixii*  
(Tlix01)

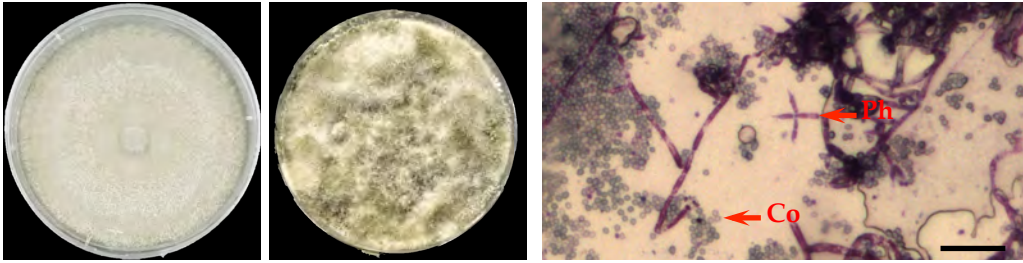

**Supplementary Figure S2. Macroscopic and microscopic aspects of the *Trichoderma* isolates.** Isolates were grown on PDA medium after 10 and 20 days of incubation at 28 °C. Morphological characteristics were visualized using optical microscopy (×100), after coloration with toluidine blue (0.5 % w/v). The scal bars represent 20 µm in all panels. Co, Conidiospores ; Chla, Chlamydo-spores; Ph, Phyalides.
