# Supplementary material for: Assessment of Tunisian Trichoderma Isolates on Wheat Seed Germination, Seedling Growth and Fusarium Seedling Blight Suppression
Source: MDPI journal article supplement (doi:10.3390/microorganisms11061512), 2023-06-06
Supplement: s1 [file s1]

**Figure S3.**

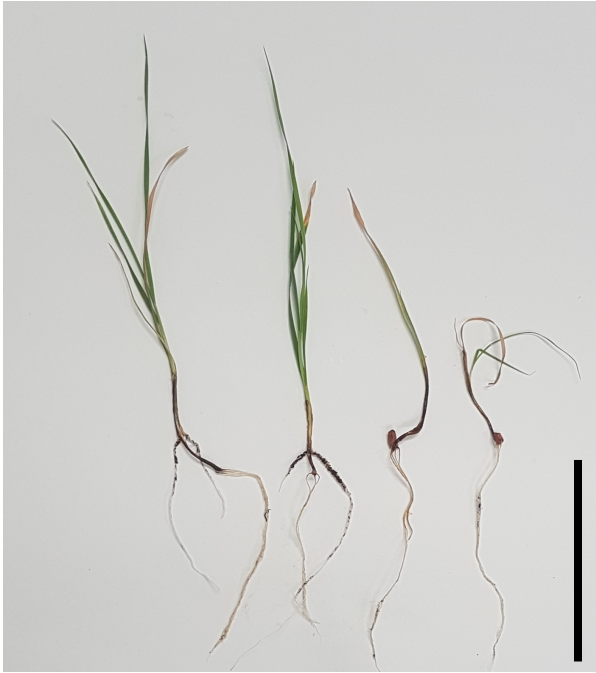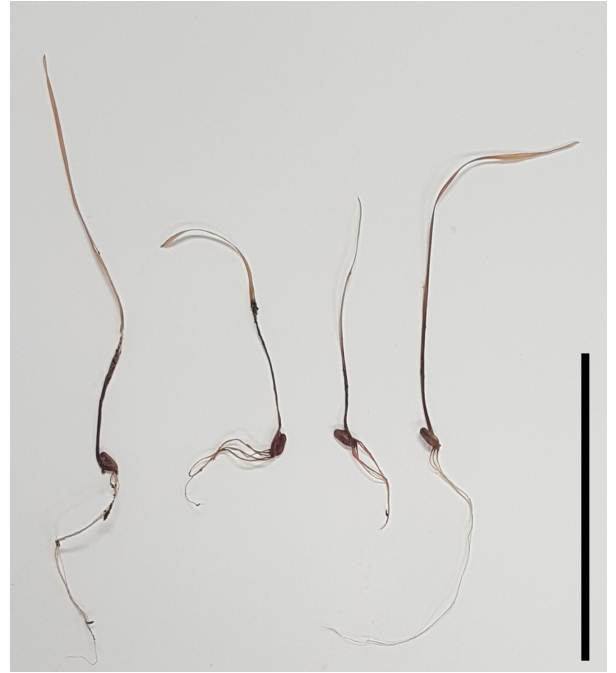

**Supplementary Figure S3. Root and leaves disease symptoms on wheat (Khlar variety) caused by *Fusarium culmorum*, 21 days after seed inoculation. The scale bars represent 10 cm.**
