# Supplementary material for: Assessment of Tunisian Trichoderma Isolates on Wheat Seed Germination, Seedling Growth and Fusarium Seedling Blight Suppression
Source: MDPI journal article supplement (doi:10.3390/microorganisms11061512), 2023-06-06
Supplement: s1 [file s1]

**Figure S4.**

**Supplementary Figure S4. Bioprotection effect of the six *Trichoderma* isolates against *F. culmorum* infestation on wheat (Khlar variety) in axenic environment, 7 days after seed co-inoculation of fungal protagonists. The white scale bars represent 5 cm. The box on the left is a top view, the right box to the down view.**

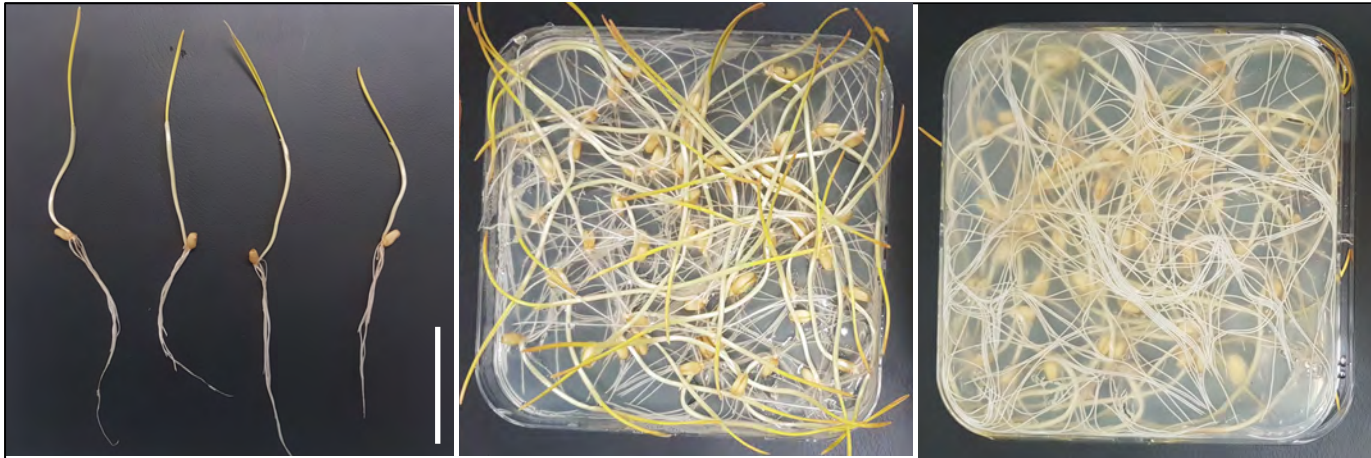

*Untreated seedlings*

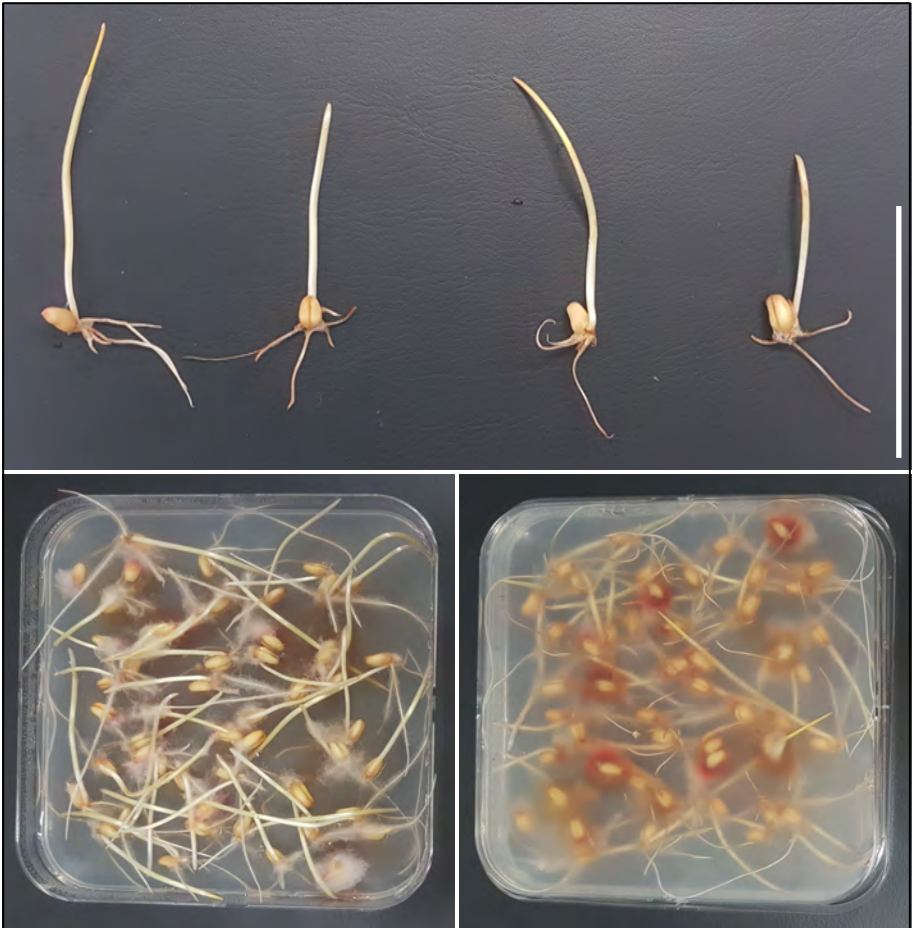

*F. culmorum*



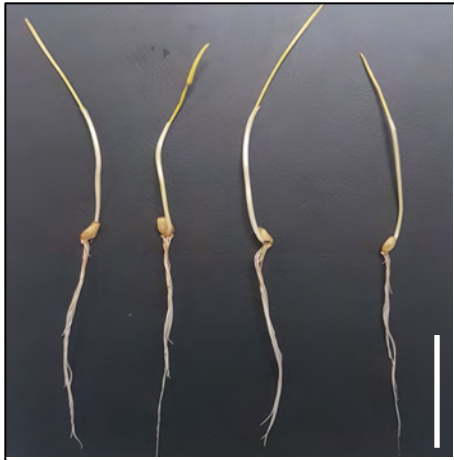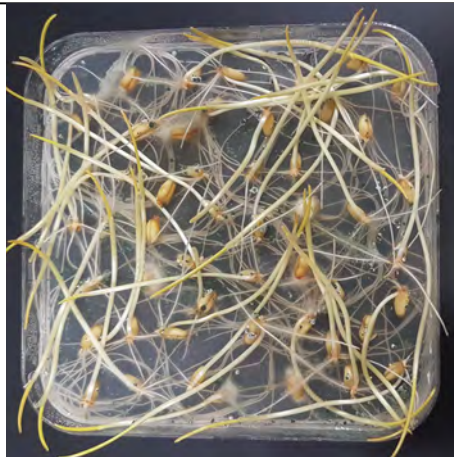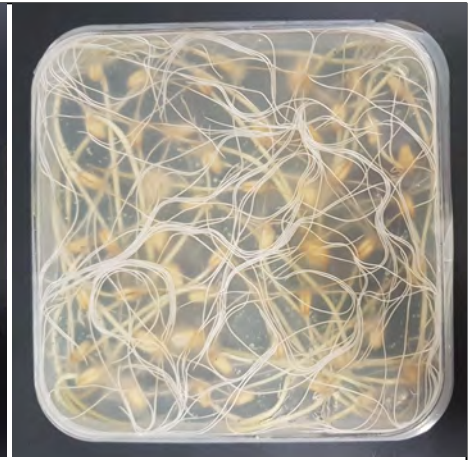

*T. afroharzianum* (Tahz01)

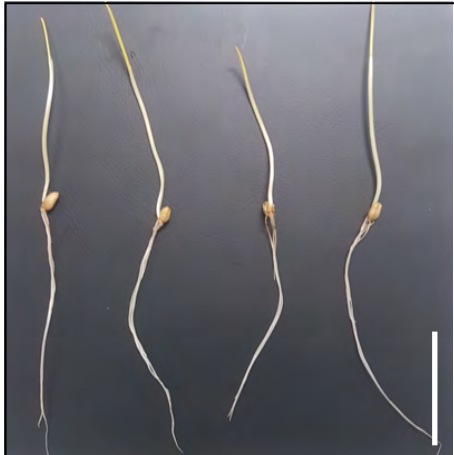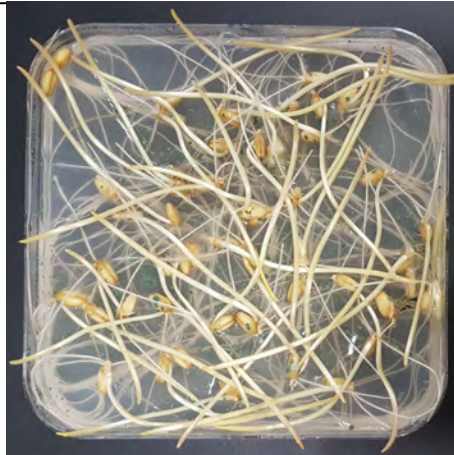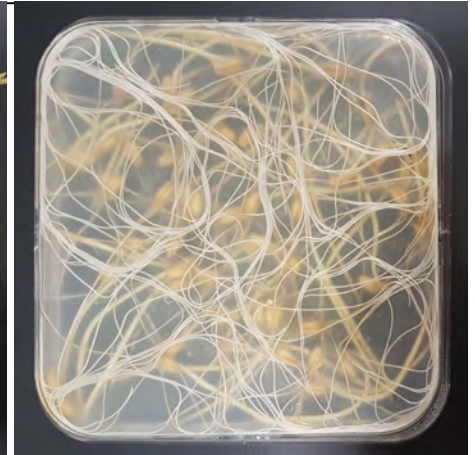

*T. afroharzianum* (Tahz02)

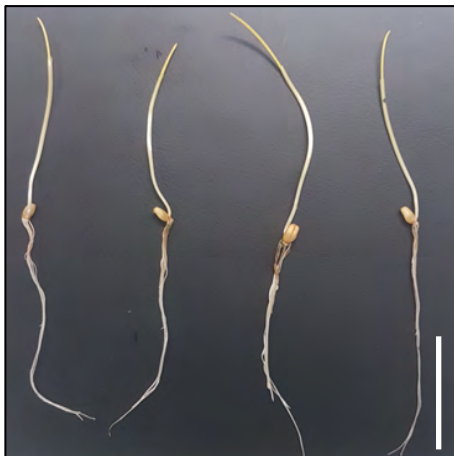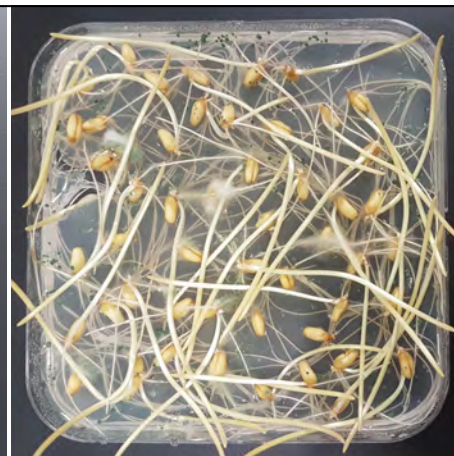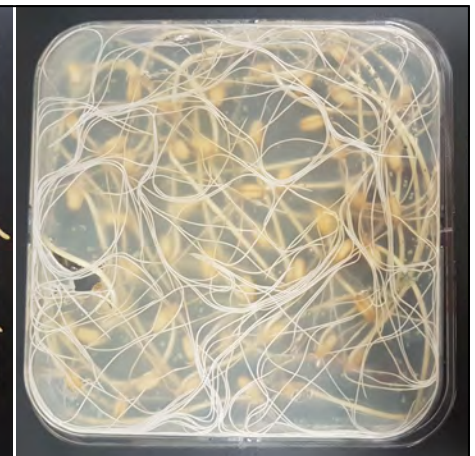

*T. afroharzianum*(Tahz03)



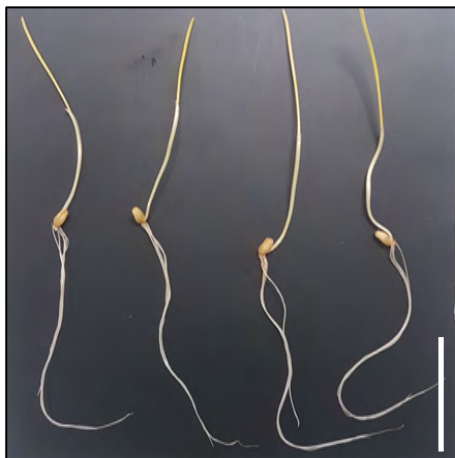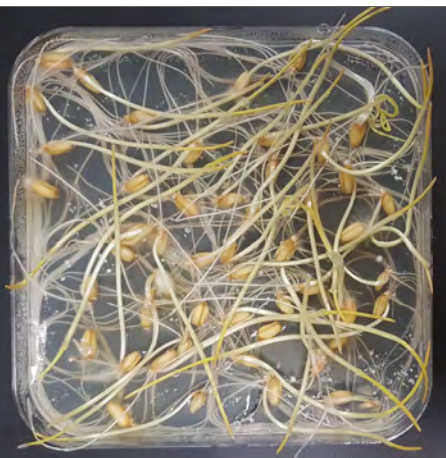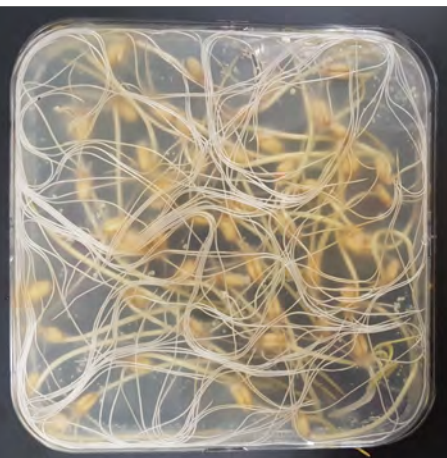

*T. atrobrunneum* (Tatr03)

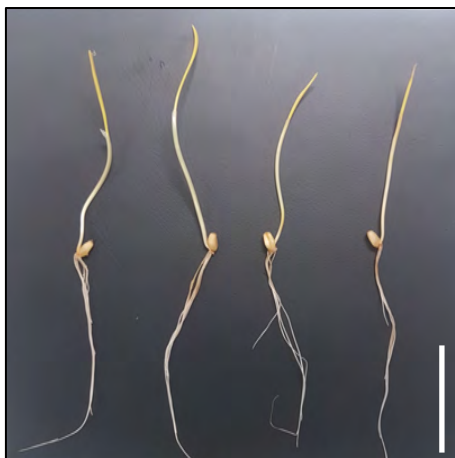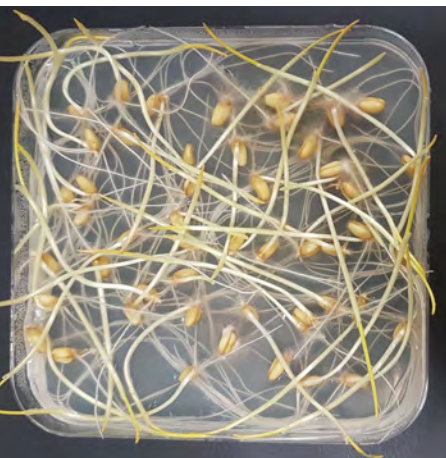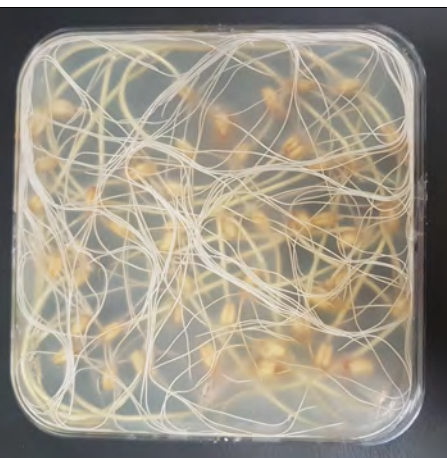

*T. Lentinulae* (Tlen01)

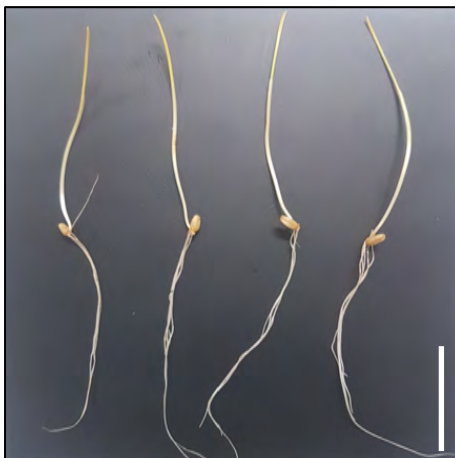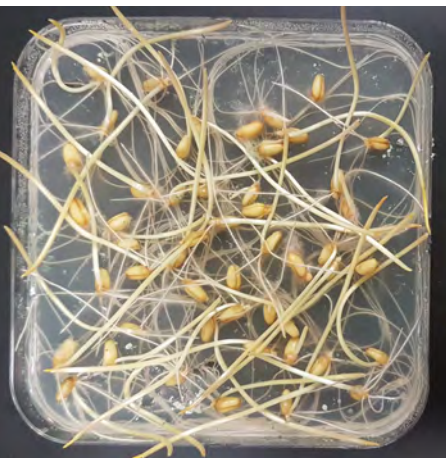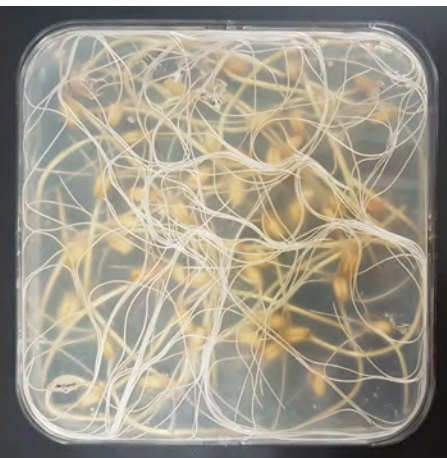

*T. Lixii* (Tlix01)
