# Supplementary material for: Assessment of Tunisian Trichoderma Isolates on Wheat Seed Germination, Seedling Growth and Fusarium Seedling Blight Suppression
Source: MDPI journal article supplement (doi:10.3390/microorganisms11061512), 2023-06-06
Supplement: s1 [file s1]

**Supplementary Table S2.** Statistical analyses of the transcript accumulation induced by *Trichoderma* isolates and/or *Fusarium culmorum* (Values highlighted in green are significant; Student's *T* realized after that normality and homoskedascity were tested; error level of 5 %; n = 3)

| Gene    | Leaves |        |        |        |        |        |             |             |             |            |             |             | Roots  |        |        |       |        |        |             |             |             |            |             |             |
|---------|--------|--------|--------|--------|--------|--------|-------------|-------------|-------------|------------|-------------|-------------|--------|--------|--------|-------|--------|--------|-------------|-------------|-------------|------------|-------------|-------------|
|         | Tahz01 | Tahz02 | Tahz03 | Tat01  | Tien01 | Tfik01 | Tahz01 + Fc | Tahz02 + Fc | Tahz03 + Fc | Tat01 + Fc | Tien01 + Fc | Tfik01 + Fc | Tahz01 | Tahz02 | Tahz03 | Tat01 | Tien01 | Tfik01 | Tahz01 + Fc | Tahz02 + Fc | Tahz03 + Fc | Tat01 + Fc | Tien01 + Fc | Tfik01 + Fc |
| ACO     | 0.057  | 0.22   | 0.23   | 0.057  | 0.081  | 0.32   | 0.053       | 0.036       | 0.019       | 0.8        | 0.82        | 0.025       | 0.85   | 0.09   | 0.049  | 0.064 | 0.16   | 0.098  | 0.61        | 0.96        | 0.27        | 0.034      | 0.034       | 0.96        |
| ACS1    | 0.034  | 0.067  | 0.11   | 0.07   | 0.084  | 0.079  | 0.089       | 0.051       | 0.059       | 0.083      | 0.067       | 0.052       | 0.062  | 0.057  | 0.042  | 0.042 | 0.049  | 0.04   | 0.68        | 0.86        | 0.4         | 0.66       | 0.42        | 0.91        |
| AOS1    | 0.027  | 0.029  | 0.57   | 0.07   | 0.9    | 0.77   | 0.08        | 0.025       | 0.15        | 0.14       | 0.15        | 0.22        | 0.07   | 0.042  | 0.07   | 0.075 | 0.027  | 0.051  | 0.58        | 0.24        | 0.43        | 0.098      | 0.81        | 0.41        |
| AOS2    | 0.011  | 0.048  | 0.13   | 0.18   | 0.064  | 0.16   | 0.025       | 0.15        | 0.15        | 0.054      | 0.059       | 0.25        | 0.04   | 0.054  | 0.052  | 0.11  | 0.026  | 0.034  | 0.14        | 0.6         | 0.74        | 0.084      | 0.68        | 0.43        |
| AQ01    | 0.11   | 0.07   | 0.05   | 0.034  | 0.2    | 0.065  | 0.64        | 0.37        | 0.27        | 0.082      | 0.083       | 0.37        | 0.027  | 0.054  | 0.041  | 0.059 | 0.025  | 0.042  | 0.97        | 0.079       | 0.47        | 0.26       | 0.78        | 0.61        |
| CAD     | 0.035  | 0.025  | 0.048  | 0.22   | 0.048  | 0.038  | 0.036       | 0.054       | 0.78        | 0.55       | 0.069       | 0.034       | 0.18   | 0.053  | 0.13   | 0.035 | 0.015  | 0.011  | 0.061       | 0.06        | 0.71        | 0.26       | 0.89        | 0.57        |
| CAT1    | 0.073  | 0.063  | 0.57   | 0.54   | 0.027  | 0.046  | 0.11        | 0.9         | 0.096       | 0.95       | 0.43        | 0.13        | 0.14   | 0.62   | 0.24   | 0.14  | 0.95   | 0.74   | 0.15        | 0.22        | 0.13        | 0.2        | 0.089       | 0.63        |
| CCR3    | 0.028  | 0.0063 | 0.22   | 0.18   | 0.012  | 0.011  | 0.092       | 0.09        | 0.016       | 0.88       | 0.79        | 0.17        | 0.18   | 0.067  | 0.11   | 0.54  | 0.15   | 0.066  | 0.57        | 0.97        | 0.5         | 0.38       | 0.68        | 0.77        |
| CHS     | 0.013  | 0.021  | 0.085  | 0.18   | 0.085  | 0.041  | 0.03        | 0.025       | 0.0048      | 0.03       | 0.25        | 0.014       | 0.11   | 0.46   | 0.51   | 0.72  | 0.04   | 0.46   | 0.24        | 0.24        | 0.36        | 0.36       | 0.74        | 0.24        |
| CHTb    | 0.05   | 0.18   | 0.48   | 0.027  | 0.18   | 0.037  | 0.035       | 0.026       | 0.096       | 0.15       | 0.16        | 0.059       | 0.2    | 0.42   | 0.57   | 0.95  | 0.07   | 0.13   | 0.92        | 0.96        | 0.13        | 0.15       | 0.95        | 0.95        |
| CHT2    | 0.71   | 0.07   | 0.29   | 0.025  | 0.095  | 0.054  | 0.028       | 0.13        | 0.061       | 0.82       | 0.82        | 0.92        | 0.48   | 0.18   | 0.3    | 0.17  | 0.53   | 0.035  | 0.045       | 0.054       | 0.044       | 0.48       | 0.035       | 0.035       |
| COMT    | 0.088  | 0.07   | 0.29   | 0.23   | 0.11   | 0.13   | 0.048       | 0.0049      | 0.061       | 0.058      | 0.035       | 0.037       | 0.25   | 0.44   | 0.18   | 0.12  | 0.54   | 0.26   | 0.27        | 0.44        | 0.22        | 0.25       | 0.21        | 0.15        |
| CRK3    | 0.012  | 0.035  | 0.14   | 0.0069 | 0.037  | 0.052  | 0.51        | 0.22        | 0.15        | 0.18       | 0.24        | 0.039       | 0.39   | 0.037  | 0.05   | 0.06  | 0.052  | 0.025  | 0.22        | 0.88        | 0.64        | 0.19       | 0.71        | 0.26        |
| DEF     | 0.05   | 0.18   | 0.085  | 0.05   | 0.026  | 0.034  | 0.68        | 0.63        | 0.16        | 0.069      | 0.069       | 0.5         | 0.025  | 0.086  | 0.024  | 0.025 | 0.4    | 0.024  | 0.12        | 0.15        | 0.16        | 0.66       | 0.7         | 0.15        |
| DFR     | 0.28   | 0.012  | 0.037  | 0.06   | 0.54   | 0.15   | 0.013       | 0.25        | 0.23        | 0.82       | 0.12        | 0.31        | 0.044  | 0.048  | 0.06   | 0.058 | 0.054  | 0.084  | 0.53        | 0.77        | 0.81        | 0.069      | 0.29        | 0.37        |
| ERF3    | 0.18   | 0.041  | 0.56   | 0.21   | 0.15   | 0.025  | 0.24        | 0.27        | 0.42        | 0.26       | 0.35        | 0.22        | 0.2    | 0.34   | 0.26   | 0.28  | 0.021  | 0.077  | 0.41        | 0.41        | 0.29        | 0.061      | 0.32        | 0.44        |
| FIS1    | 0.03   | 0.029  | 0.58   | 0.06   | 0.055  | 0.97   | 0.03        | 0.12        | 0.068       | 0.089      | 0.19        | 0.42        | 0.33   | 0.44   | 0.25   | 0.2   | 0.13   | 0.18   | 0.096       | 0.058       | 0.069       | 0.22       | 0.054       | 0.083       |
| FPL1    | 0.042  | 0.021  | 0.089  | 0.026  | 0.04   | 0.072  | 0.058       | 0.063       | 0.061       | 0.51       | 0.57        | 0.069       | 0.18   | 0.42   | 0.83   | 0.9   | 0.4    | 0.053  | 0.99        | 0.036       | 0.16        | 0.069      | 0.26        | 0.12        |
| GLP     | 0.024  | 0.13   | 0.064  | 0.014  | 0.055  | 0.23   | 0.054       | 0.12        | 0.058       | 0.26       | 0.17        | 0.46        | 0.14   | 0.057  | 0.025  | 0.025 | 0.05   | 0.025  | 0.31        | 0.96        | 0.88        | 0.16       | 0.81        | 0.22        |
| GLU     | 0.042  | 0.028  | 0.079  | 0.0071 | 0.23   | 0.05   | 0.014       | 0.11        | 0.03        | 0.083      | 0.083       | 0.13        | 0.062  | 0.086  | 0.13   | 0.033 | 0.035  | 0.11   | 0.47        | 0.47        | 0.99        | 0.2        | 0.41        | 0.8         |
| GPX     | 0.015  | 0.11   | 0.035  | 0.036  | 0.013  | 0.021  | 0.078       | 0.11        | 0.13        | 0.91       | 0.73        | 0.24        | 0.13   | 0.085  | 0.1    | 0.18  | 0.23   | 0.075  | 0.061       | 0.28        | 0.11        | 0.054      | 0.15        | 0.099       |
| GSL22   | 0.06   | 0.04   | 0.3    | 0.89   | 0.18   | 0.031  | 0.18        | 0.26        | 0.41        | 0.13       | 0.1         | 0.27        | 0.12   | 0.11   | 0.13   | 0.18  | 0.11   | 0.42   | 0.45        | 0.12        | 0.66        | 0.083      | 0.56        | 0.4         |
| EndoGLU | 0.096  | 0.016  | 0.22   | 0.042  | 0.11   | 0.062  | 0.03        | 0.068       | 0.043       | 0.63       | 0.82        | 0.035       | 0.1    | 0.095  | 0.45   | 0.31  | 0.035  | 0.049  | 0.07        | 0.082       | 0.29        | 0.088      | 0.8         | 0.48        |
| ICS     | 0.041  | 0.14   | 0.028  | 0.1    | 0.053  | 0.035  | 0.09        | 0.15        | 0.37        | 0.82       | 0.37        | 0.41        | 0.037  | 0.016  | 0.061  | 0.13  | 0.18   | 0.0082 | 0.29        | 0.26        | 0.35        | 0.51       | 0.66        | 0.21        |
| LOX     | 0.035  | 0.011  | 0.33   | 0.49   | 0.18   | 0.084  | 0.12        | 0.12        | 0.58        | 0.32       | 0.12        | 0.67        | 0.18   | 0.089  | 0.28   | 0.027 | 0.15   | 0.081  | 0.73        | 0.71        | 0.24        | 0.42       | 0.48        | 0.51        |
| LRR_RLK | 0.052  | 0.041  | 0.11   | 0.035  | 0.15   | 0.06   | 0.26        | 0.13        | 0.15        | 0.15       | 0.2         | 0.11        | 0.041  | 0.063  | 0.063  | 0.063 | 0.025  | 0.063  | 0.093       | 0.41        | 0.91        | 0.38       | 0.58        | 0.17        |
| LTP     | 0.2    | 0.37   | 0.052  | 0.07   | 0.28   | 0.025  | 0.025       | 0.025       | 0.017       | 0.0067     | 0.015       | 0.012       | 0.13   | 0.1    | 0.63   | 0.046 | 0.072  | 0.049  | 0.037       | 0.11        | 0.5         | 0.15       | 0.86        | 0.63        |
| MAPK3   | 0.038  | 0.031  | 0.067  | 0.047  | 0.2    | 0.025  | 0.087       | 0.88        | 0.22        | 0.061      | 0.056       | 0.22        | 0.086  | 0.23   | 0.29   | 0.17  | 0.22   | 0.14   | 0.48        | 0.37        | 0.078       | 0.097      | 0.55        | 0.4         |
| NPR1    | 0.0028 | 0.025  | 0.044  | 0.098  | 0.039  | 0.012  | 0.096       | 0.21        | 0.26        | 0.035      | 0.027       | 0.073       | 0.22   | 0.18   | 0.46   | 0.063 | 0.25   | 0.052  | 0.95        | 0.48        | 0.17        | 0.82       | 0.17        | 0.37        |
| OKO     | 0.012  | 0.046  | 0.028  | 0.063  | 0.2    | 0.093  | 0.049       | 0.29        | 0.13        | 0.22       | 0.19        | 0.13        | 0.085  | 0.054  | 0.085  | 0.048 | 0.035  | 0.044  | 0.56        | 0.74        | 0.98        | 0.15       | 0.68        | 0.82        |
| PAL     | 0.07   | 0.06   | 0.079  | 0.13   | 0.63   | 0.23   | 0.063       | 0.058       | 0.016       | 0.12       | 0.063       | 0.023       | 0.18   | 0.029  | 0.025  | 0.035 | 0.44   | 0.037  | 0.035       | 0.032       | 0.031       | 0.46       | 0.27        | 0.03        |
| PIE     | 0.38   | 0.28   | 0.1    | 0.44   | 0.04   | 0.22   | 0.061       | 0.067       | 0.069       | 0.17       | 0.15        | 0.4         | 0.2    | 0.048  | 0.031  | 0.04  | 0.21   | 0.031  | 0.2         | 0.51        | 0.39        | 0.62       | 0.84        | 0.82        |
| PLC     | 0.35   | 0.038  | 0.11   | 0.53   | 0.057  | 0.3    | 0.43        | 0.092       | 0.43        | 0.1        | 0.58        | 0.14        | 0.085  | 0.042  | 0.041  | 0.041 | 0.038  | 0.013  | 0.13        | 0.11        | 0.67        | 0.22       | 0.65        | 0.082       |
| POXa    | 0.01   | 0.027  | 0.036  | 0.063  | 0.011  | 0.0069 | 0.016       | 0.083       | 0.11        | 0.53       | 0.2         | 0.073       | 0.067  | 0.049  | 0.1    | 0.37  | 0.14   | 0.056  | 0.096       | 0.48        | 0.26        | 0.035      | 0.22        | 0.096       |
| POXb    | 0.0063 | 0.052  | 0.079  | 0.43   | 0.34   | 0.038  | 0.22        | 0.13        | 0.08        | 0.56       | 0.52        | 0.68        | 0.05   | 0.049  | 0.062  | 0.1   | 0.34   | 0.11   | 0.27        | 0.75        | 0.37        | 0.045      | 0.15        | 0.57        |
| PPO     | 0.025  | 0.046  | 0.036  | 0.098  | 0.058  | 0.027  | 0.0092      | 0.22        | 0.27        | 0.21       | 0.098       | 0.054       | 0.29   | 0.47   | 0.72   | 0.47  | 0.42   | 0.43   | 0.098       | 0.11        | 0.089       | 0.21       | 0.32        | 0.12        |
| PRLa    | 0.038  | 0.07   | 0.55   | 0.97   | 0.76   | 0.59   | 0.15        | 0.92        | 0.34        | 0.84       | 0.89        | 0.66        | 0.018  | 0.22   | 0.23   | 0.11  | 0.026  | 0.073  | 0.5         | 0.52        | 0.22        | 0.15       | 0.29        | 0.81        |
| PR1b    | 0.052  | 0.038  | 0.2    | 0.0063 | 0.22   | 0.52   | 0.014       | 0.088       | 0.061       | 0.096      | 0.059       | 0.051       | 0.035  | 0.025  | 0.029  | 0.026 | 0.15   | 0.079  | 0.22        | 0.25        | 0.086       | 0.83       | 0.21        | 0.21        |
| psgGST  | 0.063  | 0.15   | 0.1    | 0.065  | 0.3    | 0.79   | 0.034       | 0.15        | 0.031       | 0.069      | 0.016       | 0.06        | 0.69   | 0.75   | 0.81   | 0.95  | 0.53   | 0.4    | 0.1         | 0.23        | 0.97        | 0.26       | 0.91        | 0.2         |
| RboHd   | 0.53   | 0.37   | 0.14   | 0.041  | 0.14   | 0.26   | 0.19        | 0.2         | 0.21        | 0.054      | 0.036       | 0.043       | 0.17   | 0.2    | 0.2    | 0.16  | 0.4    | 0.056  | 0.11        | 0.12        | 0.53        | 0.92       | 0.58        | 0.69        |
| RboHf   | 0.13   | 0.045  | 0.084  | 0.065  | 0.078  | 0.042  | 0.11        | 0.37        | 0.12        | 0.094      | 0.088       | 0.096       | 0.058  | 0.04   | 0.045  | 0.05  | 0.26   | 0.085  | 0.44        | 0.61        | 0.12        | 0.13       | 0.92        | 0.69        |
| RLCK    | 0.012  | 0.013  | 0.2    | 0.018  | 0.012  | 0.013  | 0.054       | 0.11        | 0.016       | 0.044      | 0.033       | 0.081       | 0.57   | 0.17   | 0.15   | 0.19  | 0.48   | 0.2    | 0.47        | 0.2         | 0.12        | 0.7        | 0.98        | 0.27        |
| SOD     | 0.11   | 0.025  | 0.53   | 0.43   | 0.64   | 0.035  | 0.79        | 0.24        | 0.96        | 0.11       | 0.11        | 0.083       | 0.14   | 0.042  | 0.38   | 0.21  | 0.69   | 0.81   | 0.054       | 0.11        | 0.82        | 0.18       | 0.86        | 0.093       |
| WAK2    | 0.026  | 0.0075 | 0.022  | 0.011  | 0.025  | 0.11   | 0.95        | 0.2         | 0.23        | 0.26       | 0.27        | 0.11        | 0.17   | 0.042  | 0.048  | 0.11  | 0.66   | 0.095  | 0.81        | 0.91        | 0.8         | 0.69       | 0.49        | 0.86        |
| WAK6    | 0.13   | 0.29   | 0.39   | 0.041  | 0.04   | 0.94   | 0.4         | 0.1         | 0.45        | 0.15       | 0.3         | 0.069       | 0.37   | 0.23   | 0.084  | 0.66  | 0.97   | 0.66   | 0.048       | 0.11        | 0.5         | 0.017      | 0.13        | 0.12        |
