# Supplementary material for: Assessment of Tunisian Trichoderma Isolates on Wheat Seed Germination, Seedling Growth and Fusarium Seedling Blight Suppression
Source: MDPI journal article supplement (doi:10.3390/microorganisms11061512), 2023-06-06
Supplement: s1 [file s1]

Figure S7.

| Isolates           | <i>Trichoderma</i> |       | <i>Fusarium</i> |       |
|--------------------|--------------------|-------|-----------------|-------|
|                    | Leaves             | Roots | Leaves          | Roots |
| Control            | -                  | -     | -               | -     |
| Tahz01             | nd                 | +     | nd              | +     |
| Tahz02             | nd                 | +     | nd              | +     |
| Tahz03             | nd                 | +     | nd              | +     |
| Tatr01             | nd                 | +     | nd              | +     |
| Tlen01             | nd                 | +     | nd              | +     |
| Tlix01             | nd                 | +     | nd              | +     |
| <i>F. Culmorum</i> | -                  | -     | +               | +     |

Supplementary Figure S7. Qualitative molecular characterisation of the presence of *Trichoderma* or *F. culmorum* isolates in the aerial and underground parts of wheat plants 21 days after seed treatment with *Trichoderma* and/or *F. culmorum* isolates. Characterisation carried out on samples used for molecular analysis of plant defences. Presence detected by PCR through the amplification of the gene encoding for *Tubulin*, and whose primers are specific to the *Trichoderma* or *Fusarium* genera. The PCR analyses were conducted on cDNA diluted 1:5 and 1:20. “+”, significant PCR signal; “-”, no PCR signal; nd: not detectable (signal not analysable because it is mired in an amplification background noise).
