# Supplementary material for: Assessment of Tunisian Trichoderma Isolates on Wheat Seed Germination, Seedling Growth and Fusarium Seedling Blight Suppression
Source: MDPI journal article supplement (doi:10.3390/microorganisms11061512), 2023-06-06
Supplement: s1 [file s1]

**Figure S6.**

**Volatil organic compounds**

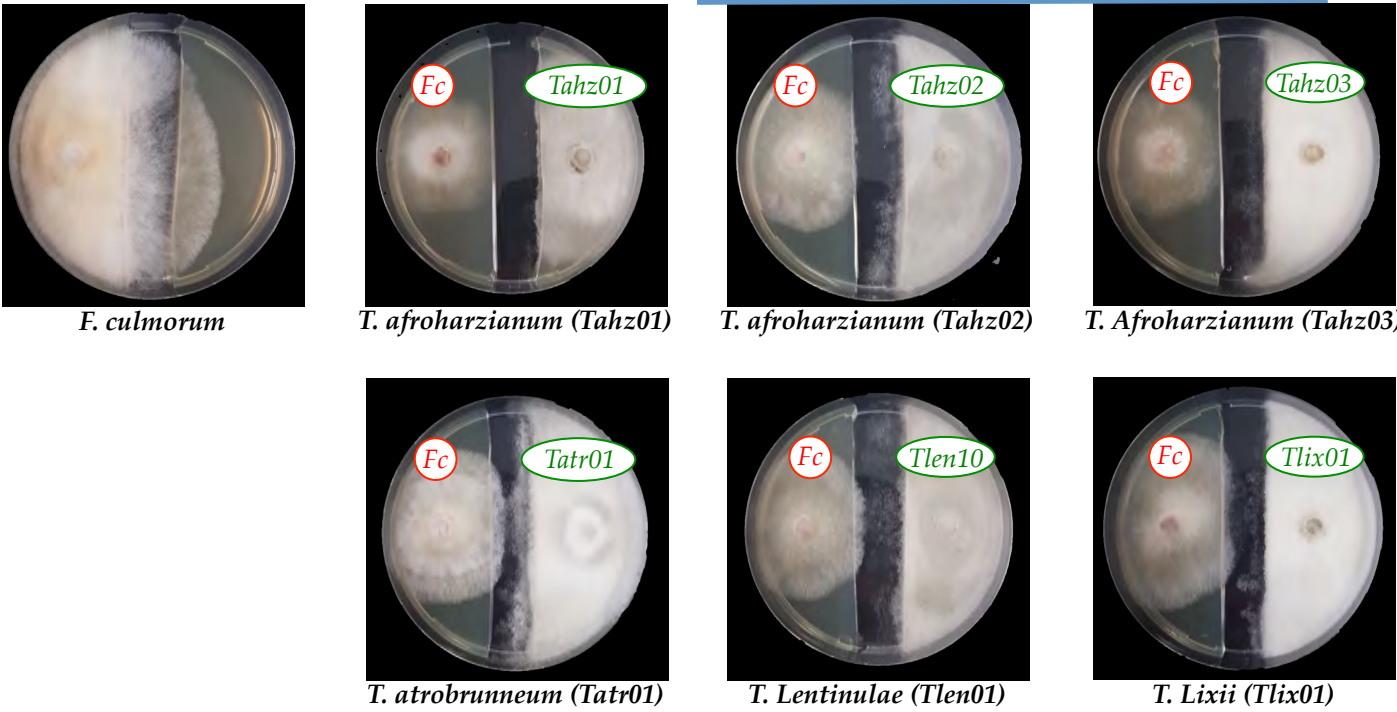

**Diffusible organic compounds**

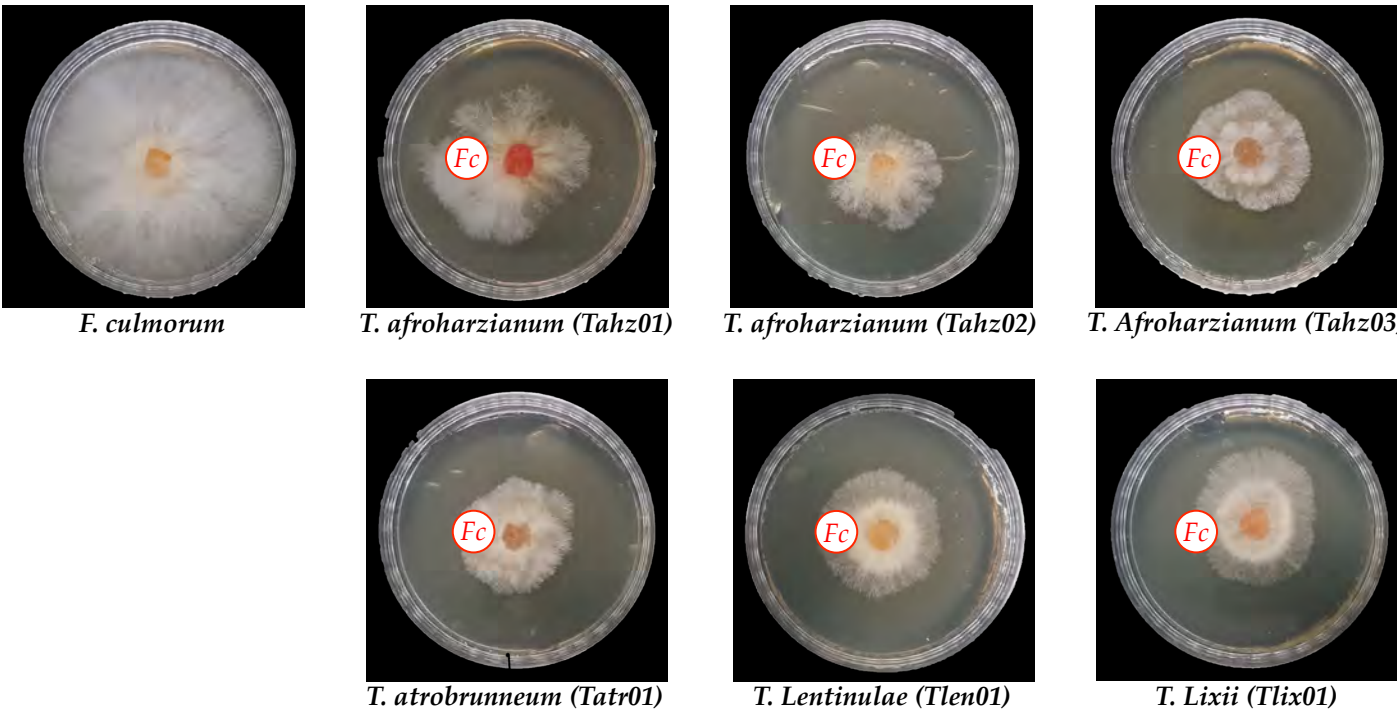

**Supplementary Figure S6. Indirect antagonistic activity related to emission of volatile and diffusible organic compounds by *Trichoderma* isolates against *F. culmorum* on PDA medium after 7 days of confrontation (28 °C). Photographic examples for one biological repetition from six ones.**
