# Supplementary material for: Assessment of Tunisian Trichoderma Isolates on Wheat Seed Germination, Seedling Growth and Fusarium Seedling Blight Suppression
Source: MDPI journal article supplement (doi:10.3390/microorganisms11061512), 2023-06-06
Supplement: s1 [file s1]

Figure S5.

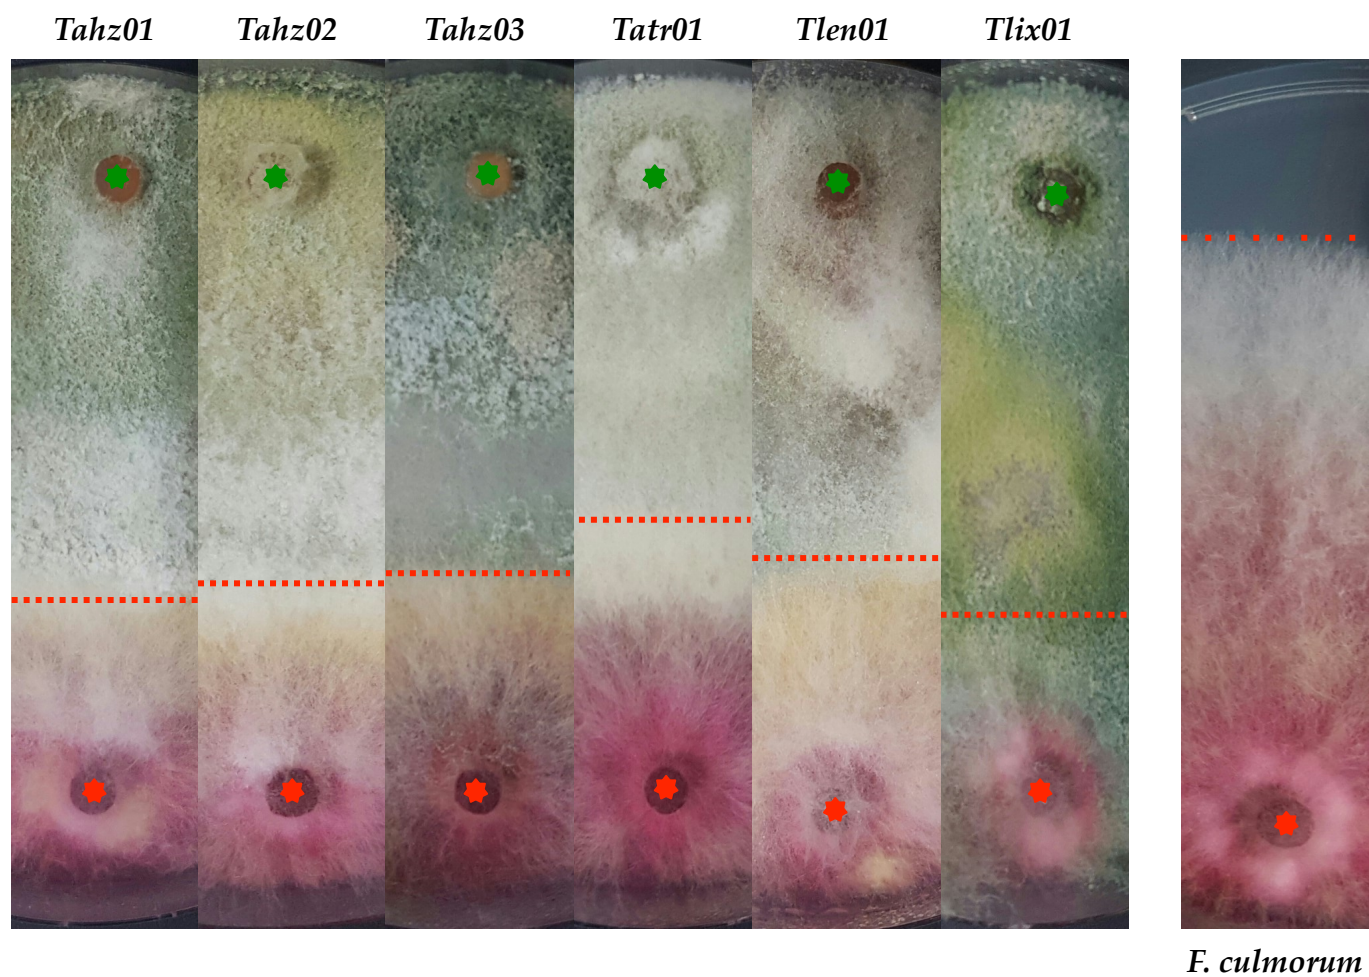

**Supplementary Figure S5. Direct mycelial confrontation between *Trichoderma* isolates and *F. culmorum*.** Development of the mycoparasitic reaction of the 6 *Trichoderma* isolates (★) against *F. culmorum* (★). Mycelial was grown on PDA medium for 6 days at 27 °C. The growth periphery of *F. culmorum* is indicated by a dotted red line.
