# Supplementary material for: Assessment of Tunisian Trichoderma Isolates on Wheat Seed Germination, Seedling Growth and Fusarium Seedling Blight Suppression
Source: MDPI journal article supplement (doi:10.3390/microorganisms11061512), 2023-06-06
Supplement: s1 [file s1]

**Supplementary Table S1.** Primers used for *q*PCR amplification of the wheat defense-encoding genes.

| Function                      | Gene, full name                                           | Acronym | primer (For/Rev)                                    | PCR efficiency |
|-------------------------------|-----------------------------------------------------------|---------|-----------------------------------------------------|----------------|
| Receptors                     | Receptor Like Kinase                                      | LRR-RLK | TGTCGATTCTCGATCAAGG / GGTGAAATTTGGTGTGCAC           | 2,01           |
|                               | Receptor-like cytoplasmic kinase                          | RLCK1   | GCGAGGGTGAGATTCTGGAG / CTGGCTTAGTTGGGGTGAGG         | 1,81           |
|                               | Wall Associated Kinase 2                                  | WAK2A   | GGTATCGTGCTACTGGAGCTC / CTCCCATGGTAGCCTGTTA         | 2,15           |
|                               | Wall Associated Kinase 6                                  | WAK6    | AGAACCTCTCGTCGCACTTC / CCTTAGCTGCCAAGCTCTT          | 2,14           |
| Transduction network          | Mitogen-activated protein kinase 3                        | MAPK3   | TACATGAGGCACCTGCCGAGT / GGTTCAACTCCAGGCTTCGTTG      | 2,32           |
|                               | Cysteine-rich receptor-like kinase                        | CERK3   | AGGTTTCGAGACTTTCATGTTCT / GTGGAGCAGCTACAGATATAGC    | 2,18           |
| ROS generation and diffusion  | NADPH oxidase (subunit D)                                 | RbohD   | ACCACCAAGACAGACAGAC / TGTTGGATAGGAGGCGTAG           | 2,31           |
|                               | NADPH oxidase (subunit F)                                 | RbohF   | TGGCACCCCTTCTCAATTAC / CTCTCGTGCTCAGTCACCA          | 1,97           |
|                               | Aquaporin                                                 | AQP1    | TGGTCAGACCACTGGATCTTC / TGGCATCTTCTTGACGAC          | 2,07           |
| Antioxidative complexe        | Glutathion peroxidase                                     | GPX     | GCGGTGACACCAACATCAAC / GTCCAGGTTCTCCAGTTGG          | 1,99           |
|                               | Catalase                                                  | CAT     | CACCTGGTGAGAGAATGCG / TCACCTCGAAGAAGCCCTTG          | 1,96           |
|                               | Superoxide dismutase                                      | SOD     | CAGATGCCAGATTCTTTGACT / GAAACCAAGCAGCTACAACG        | 2,11           |
|                               | Glutathion S-transferase                                  | GST     | TGCTCCGCAAGTACAAGACG / ATGAGCGGGTTGATGAGGC          | 2,01           |
| Phenylpropanoid pathway       | Phenylalanine ammonia lyase                               | PAL     | GGCCCAAACTGGAAGTTATTC / GGAAGTTGCCACCGTGGAT         | 2,09           |
|                               | Chalcone synthase                                         | CHS     | GCGCTCGTGCTACTCTTCATC / CCTCGCGGAGCGTTT             | 1,92           |
|                               | caffeic acid O-methyltransferase                          | COMT    | ACGTCGACATGATCATGCTC / ACTCGATGGCAATGCGTTG          | 2,07           |
|                               | dihydroflavonol 4-réductase                               | DFR     | TACGACGAGCAACTGGAG / GGGATGATGCTGATGAAGTC           | 1,95           |
|                               | Flavonol synthase1                                        | FLS     | GGTGTTCGAAGGACGATGCTGGTA / CGGCCACGACATCCGCTCTT     | 2,16           |
|                               | Polyphenol oxidase                                        | PPO     | GTCCGGACGAACAAGAGAA / GGGCATGCTTCACTTGGTAT          | 2,09           |
|                               | Benzooate 4-monoxygenase                                  | B4MO    | CGCCGAGGACATGCACGAGTG / GAAGACGCCGTGCCAAGGG         | 2,09           |
| Secondary metabolisms         | Cinnamyl alcohol dehydrogenase                            | CAD1    | AGATACCGCTTCGTCTATCG / GAATCGCACGCCAACCC            | 1,97           |
|                               | Cinnamyl Coenzyme Reductase 3                             | CCR3    | CTGTCCGGTAGTTAATTCTATG / ATATGATCGCCAAACCAACC       | 2,11           |
|                               | glucan synthase-like 22 (callose synthase)                | GSL22   | GTCTGGGGCGGATTTTA / GCTGATGACAGCCGGTAGT             | 2,18           |
|                               | Farnesyl pyrophosphate synthase (sesquiterpenes)          | FPS1    | TCCTTCAAGCCACTCAGAGGAA / TGTTCTGTATTGCACAATGCGCCG   | 2,12           |
|                               | β-glucosidase (cyanogenic glycosides)                     | BGD2    | ATGGTATATGGATCCACTGACGT / TATGGGATTCCCGTTACGCTCAC   | 1,87           |
| Pathogenesis Related Proteins | Pathogenesis Related protein 1a (PR-1)                    | PR1a    | GAATGCAGACGCCCAAGCTA / GCACGGGACGCGTTGT             | 1,78           |
|                               | Pathogenesis Related protein 1b (PR-1)                    | PR1b    | ACTACGACTACGGGTCCAACA / TCGTAGTTGCAGGTGATGAAG       | 2,26           |
|                               | Glucanase (PR-2)                                          | GLU     | TCCTGGGTTCAGAAACAATGCTC / TTGATGTTGACAGCCGGTAGT     | 1,96           |
|                               | Chitinase basic, class 1 (PR-3)                           | CHTb    | GCCACGTCCCACTACTAT / CCGCAAGATCGTAGTTGGA            | 2,25           |
|                               | Chitinase (PR-4)                                          | CHT2    | GGGTGGACCTGCTGAACAAT / AGAACCATATCGCGTCTTGA         | 2,01           |
|                               | Peroxydase (PR-9)                                         | POX2    | TGCTTTGTCCAAGGCTGTGA / GACCCGCGTTTGTCCA             | 1,97           |
|                               | Defensine (PR-12)                                         | DEF     | ATGTCCGTGCTTTTGCTA / CCAAACTACCGAGTCCCG             | 1,93           |
|                               | Lipid transfer protein (PR-14)                            | LTP     | ACGTAGGTACTCTCTCGCTGT / GTTGATCGACCACTTCTTCTCA      | 2,19           |
|                               | Oxalate oxidase (PR-15)                                   | OXO     | GCCAGAACCCGGTATCG / GGTGGGTTGGAGCTGAAGAG            | 2,14           |
|                               | Germine-like (PR-16)                                      | GLP     | AACAAAGGTGATGTTGCTCTTC / GAGCCGCTCTATTGTATTCTTTCC   | 1,83           |
| Phytohormonal status          | Non Expresseur of Pathogenesis Related -1 (SA syhtesis)   | NPR1    | GCTTGTGAGATGCTGCTC / GAACAGTATAACCTCTTGGGTTTC       | 1,78           |
|                               | Isochorismate synthase (SA syhtesis)                      | ICS     | AGAAATGAGGACGACGAGTTTGAC / CCAAGTAGTGCTGATCAATCCCAA | 2,04           |
|                               | Enhanced Disease Susceptibility 1 (SA syhtesis)           | EDS1    | CATCATCCACGAATACCGCTGG / CCTAGGATTGAGCTAGTGCAATCC   | 2,01           |
|                               | Aminocyclopropane (ACC) synthase 1 (Et syhtesis)          | ACS1    | CTCGAAACCTGCAAGAGATAG / CTGCAAACTCTGCAAGAGATAG      | 1,89           |
|                               | Aminocyclopropane (ACC) oxydase (Et syhtesis)             | ACO     | TGTCCATCGCTCTCTTCTA / CGAACACGAACCTTGGGTAT          | 1,79           |
|                               | Ethylene response Factor 3 (Et pathway)                   | ERF3    | GCAATCGGGCAAGCAAAAC / CGAATCAGAACGAACACGA           | 2,02           |
|                               | Ethylene Insensitive3-Like1 (Et pathway)                  | EIL1b   | GGCTCAACAACCTGGATTIT / CCCTGTCCAAGAAGAACCT          | 2,03           |
|                               | Ethylene signaling pathway (Et pathway)                   | PIE     | GGAGCCACCAAGTCCGTATGA / CACCCGGCAGAGGTATTCAA        | 1,87           |
|                               | Jasmonate resistant 1 (JA synthesis)                      | JAR1b   | TCCTTGTTCGCCCTTCTTTG / GCGGAACAAAATCAAATTGC         | 1,78           |
|                               | Lipoxygénase (JA synthesis)                               | LOX     | GGGCACCAAGGAGTACAAGGA / GCTCGTGTGGTGTGGATGA         | 2,18           |
|                               | Allene oxide synthase 1 (JA synthesis)                    | AOS     | ACCGTGTTCACAGCTACGG / AGCGCTCTATCGTCACCTT           | 1,92           |
|                               | Allene oxide synthase 2 (JA synthesis)                    | AOS     | AGGCCGGAGAGAAGTTCCAC / CCGACTTGGTCAGCTCCATC         | 2,05           |
|                               | Phosphoinositide-specific phospholipase (lipid signaling) | PLC     | CCCGAGAAAGCACGACAT / CCCAAGCTCATCCGAGACA            | 1,87           |
| Housekeeping genes            | Actine                                                    | ACT     | AGTGGAGGTTCTACCATGTTTCT / CACTGTATTCTTTCAAGTGGGTG   | 2,52           |
|                               | RNaseL inhibitor-like                                     | Rli     | TTGAGCAACTCATGGACCAG / GCTTTCGAAGGCAACAACAT         | 2,09           |
|                               | Heteogeneous nuclear ribonucleoprotein (hn-RNP-Q)         | RPN     | TCACCTTCGCCAAGCTCAGAAGTA / AGTTGAACCTGCCCGAAAC      | 2,05           |

| Function                      | Gene, full name                                                  | Acronym | primer (For/Rev)                                     | PCR efficiency |
|-------------------------------|------------------------------------------------------------------|---------|------------------------------------------------------|----------------|
| Receptors                     | <i>Receptor Like Kinase</i>                                      | LRR-RLK | TGCTGCATTCTGTATCAAGG / GGTGAAATTTGGTGTGCAC           | 2,01           |
|                               | <i>Receptor-like cytoplasmic kinase</i>                          | RLCK1   | GCGAGGGTGAGATTCTGGAG / CTGGCTTAGTTGGGTGAGG           | 1,81           |
|                               | <i>Wall Associated Kinase 2</i>                                  | WAK2A   | GGTATCGTGCTACTGGAGCTC / CTCCATGGTAGCCCTGTTA          | 2,15           |
|                               | <i>Wall Associated Kinase 6</i>                                  | WAK6    | AGAACCTCTCGTCGCACTTC / CCTTAGCTGCCAAGCTCTT           | 2,14           |
| Transduction network          | <i>Mitogen-activated protein kinase 3</i>                        | MAPK3   | TACATGAGGCACCTGCCGAGT / GGTCAACTCCAGGCTTCGTTG        | 2,32           |
|                               | <i>Cysteine-rich receptor-like kinase</i>                        | CERK3   | AGGTTCCGAGACTTTCATGTTCT / GTGGAGCAGCTACAGATATAGC     | 2,18           |
| ROS generation and diffusion  | <i>NADPH oxidase (subunit D)</i>                                 | RbohD   | ACCACCAGACAGACAGAC / TGGTTGGATAGGAGCGTAG             | 2,31           |
|                               | <i>NADPH oxidase (subunit F)</i>                                 | RbohF   | TGGCACCCCTTCTCAATTAC / CTCTCGTGCCAGTCACCAA           | 1,97           |
|                               | <i>Aquaporin</i>                                                 | AQP1    | TGGTCAGACCACTGGATCTTC / TGGCATCTTCTTGCAGCAG          | 2,07           |
| Antioxidative complexe        | <i>Glutathion peroxidase</i>                                     | GPX     | GCGGTGACACCAACATCAAC / GTCAGGTTCTCCAGGTTGG           | 1,99           |
|                               | <i>Catalase</i>                                                  | CAT     | CACCTGGTGGAAGAATGCG / TCACCTCGAAGAAGCCCTTG           | 1,96           |
|                               | <i>Superoxide dismutase</i>                                      | SOD     | CGATAGCCAGATTCCTTTGACT / GAAACAGCGACCTACAACG         | 2,11           |
|                               | <i>Glutathion S-transferase</i>                                  | GST     | TGCTCCGCAAGTACAAGACG / ATGAGCGGGTTGATGAGGC           | 2,01           |
| Phenylpropanoid pathway       | <i>Phenylalanine ammonia lyase</i>                               | PAL     | GGCCACAAATCGAAGTTATT / GGAAGTTGCCACCGTGGAT           | 2,09           |
|                               | <i>Chalcone synthase</i>                                         | CHS     | GCGCTCGCTACTCTTTCATC / CCTCGCGGAGCGTIT               | 1,92           |
|                               | <i>caffeic acid O-methyltransferase</i>                          | COMT    | ACGTGACATGATCATGCTC / CTCGATGGCAAAATGCGTTG           | 2,07           |
|                               | <i>dihydroflavonol 4-réductase</i>                               | DFR     | TACGACCAGGACAACTGGAG / GGGATGATGCTGATGAAGTC          | 1,95           |
|                               | <i>Flavonol synthase1</i>                                        | FLS     | GGTGTTCAAGGACGGATGCTGGTA / CGGCACGACATCCGCGTCTT      | 2,16           |
|                               | <i>Polyphenol oxidase</i>                                        | PPO     | GTCCGGACGAACAAGAAGAA / GCGGATGCTTCACTTGGTAT          | 2,09           |
|                               | <i>Benzotate 4-monoxygenase</i>                                  | BAMO    | CGCCGAGGACATGACGAGTG / GAAGACGCGTGCAGAAAGGG          | 2,09           |
| Secondary metabolisms         | <i>Cinnamyl alcohol dehydrogenase</i>                            | CAD1    | AGATACCGCTTCTGTCATCG / GAATCGGACGACCAACC             | 1,97           |
|                               | <i>Cinnamyl Coenzyme Reductase 3</i>                             | CCR3    | CTGTGCGGTAGTTAATTCTATG / ATATGATCGCAACCAACC          | 2,11           |
|                               | <i>glucan synthase-like 22 (callose synthase)</i>                | GSL22   | GTCTGGGGCGAATTTA / GCTGTATGACCAACTGCTGA              | 2,18           |
|                               | <i>Farnesyl pyrophosphate synthase (sesquiterpenes)</i>          | FPS1    | TCCTTCAACGCCACTTCAGAGGAA / TGCTTTGATTGCACATGCGCCG    | 2,12           |
|                               | <i>β-glucosidase (cyanogenic glycosides)</i>                     | BGD2    | ATGGTATATGGATCCACTGACGT / TATGGGATTCGGTTACGCTCAC     | 1,87           |
| Pathogenesis Related Proteins | <i>Pathogenesis Related protein 1a (PR-1)</i>                    | PR1a    | GAATGACGACGCCAAGCTA / GCACGCGAGCGTTGT                | 1,78           |
|                               | <i>Pathogenesis Related protein 1b (PR-1)</i>                    | PR1b    | ACTACGACTACGGGTCCAACA / TCGTAGTTGACAGTGATGAAG        | 2,26           |
|                               | <i>Glucanase (PR-2)</i>                                          | GLU     | TCCTGGGTTCAGAACAAATGTC / TTGATGTTGACAGCCGGTAGT       | 1,96           |
|                               | <i>Chitinase basic, class 1 (PR-3)</i>                           | CHTb    | GCCACGTCCCCACCACTACTAT / CCGGCAAGATCGTAGTTGGA        | 2,25           |
|                               | <i>Chitinase (PR-4)</i>                                          | CHT2    | GGGTGGACCTGCTGAAACAAT / AGAACCATATCGCCGCTTGA         | 2,01           |
|                               | <i>Peroxydase (PR-9)</i>                                         | POX2    | TGCTTTGTCCAAGGCTGTGA / GACCCGCTTTTGTTCGA             | 1,97           |
|                               | <i>Defensine (PR-12)</i>                                         | DEF     | ATGTCCGTGCCTTTTGCTA / CCAAACACCGAGTCCCG              | 1,93           |
|                               | <i>Lipid transfer protein (PR-14)</i>                            | LTP     | ACGTAGGTACTCCTCTCGCTGT / GTTGATCGACCACTTCTCTCA       | 2,19           |
|                               | <i>Oxalate oxidase (PR-15)</i>                                   | OXO     | GCCAGAACCCCGTATCG / GGTGGTGGAGCTGAAGAG               | 2,14           |
|                               | <i>Germin-like (PR-16)</i>                                       | GLP     | AACAAAGGTGATGTGTCGTCTC / GAGCCGTCTATTGTATCTTTTC      | 1,83           |
| Phytohormonal status          | <i>Non Expresseur of Pathogenesis Related -1 (SA syhtesis)</i>   | NPR1    | GCTTGTGAGATGCTGCTC / GAACAGTATAACCTCTTGGGTTTC        | 1,78           |
|                               | <i>Ischorismate synthase (SA syhtesis)</i>                       | ICS     | AGAAATGAGGACGACGAGTTTGAC / CCAAGTAGTGCTGATCTAATCCCAA | 2,04           |
|                               | <i>Enhanced Disease Susceptibility 1 (SA syhtesis)</i>           | EDS1    | CATCATCCACGAATACCGCTGG / CCTAGGATTGAGCTAGTGATCC      | 2,01           |
|                               | <i>Aminocyclopropane (ACC) synthase 1 (Et syhtesis)</i>          | ACS1    | CTCGAAACCTCGAAGAGATAG / CTCGAAACCTCGAAGAGATAG        | 1,89           |
|                               | <i>Aminocyclopropane (ACC) oxydase (Et syhtesis)</i>             | ACO     | TGTCCATCGCTCCTTCTA / CGAACACGAACCTTGGGTAT            | 1,79           |
|                               | <i>Ethylene response Factor 3 (Et pathway)</i>                   | ERF3    | GCAATCGGGCAAAGCAAAC / CGAECTCAGAACGAACACGA           | 2,02           |
|                               | <i>Ethylene Insensitive3-Like1 (Et pathway)</i>                  | EIL1b   | GGCTCAACAACCTGGATTTT / CCCTGTCCAAGAAACCTC            | 2,03           |
|                               | <i>Ethylene signaling pathway (Et pathway)</i>                   | PIE     | GGAGCCACCAAGTCCGTATGA / CACCCGGCAGAGGATTTCAA         | 1,87           |
|                               | <i>Jasmonate resistant 1 (JA synthesis)</i>                      | JAR1b   | TCCTCTGTGCGCCTTCTTIG / GCGGAACAAAATCAAAATTGC         | 1,78           |
|                               | <i>Lipoxygenase (JA synthesis)</i>                               | LOX     | GGGCACCAAGGAGTACAAGGA / GCTCGTGATGGTGTGGATGA         | 2,18           |
|                               | <i>Allene oxide synthase 1 (JA synthesis)</i>                    | AOS     | ACCGTGTTCAACAGCTACGG / AGCGCTCTATCGTCACCTT           | 1,92           |
|                               | <i>Allene oxide synthase 2 (JA synthesis)</i>                    | AOS     | AGGCCGGAGAGAAGTTCCAC / CCGACTTGGTCAGCTCCATC          | 2,05           |
|                               | <i>Phosphoinositide-specific phospholipase (lipid signaling)</i> | PLC     | CCCGGAGAAAGCAGACAT / CCCAAGCTCATCCGAGACA             | 1,87           |
| Housekeeping genes            | <i>Actine</i>                                                    | ACT     | AGTGGAGGTTCTACCATGTTTCT / CACTGTATTTCCTTCAGGTGGTG    | 2,52           |
|                               | <i>RNaseL inhibitor-like</i>                                     | Rli     | TTGAGCAACTCATGGACCAG / GCTTTCAAAGGCACAAACAT          | 2,09           |
|                               | <i>Heteogeneous nuclear ribonucleoprotein (hn-RNP-Q)</i>         | RPN     | TCACCTTCGCCAAGCTCAGAACTA / AGTTGAACTTGCCCGAAAC       | 2,05           |
