# Supplementary material for: Assessment of Tunisian Trichoderma Isolates on Wheat Seed Germination, Seedling Growth and Fusarium Seedling Blight Suppression
Source: Microorganisms. 2023 Jun 6;11(6):1512. doi: 10.3390/microorganisms11061512 (PMC10303082; doi:10.3390/microorganisms11061512)
Supplement: Supplementary file 1 [file microorganisms-11-01512-s001.zip]

Archive with 9 entries (9 files):
- Supplemental Fig S1.pdf
- Supplemental Fig S2.pdf
- Supplemental Fig S3.pdf
- Supplemental Fig S4.pdf
- Supplemental Fig S5.pdf
- Supplemental Fig S6.pdf
- Supplemental Fig S7.pdf
- Supplemental Table S1.pdf
- Supplemental Table S2.pdf
